# Supplementary material
Source: HighWire-hosted journal article supplement (https://nutrition.bmj.com/content/6/2/293)
Supplement: inline-supplementary-material-1 [file inline-supplementary-material-1.pdf]

## Appendix

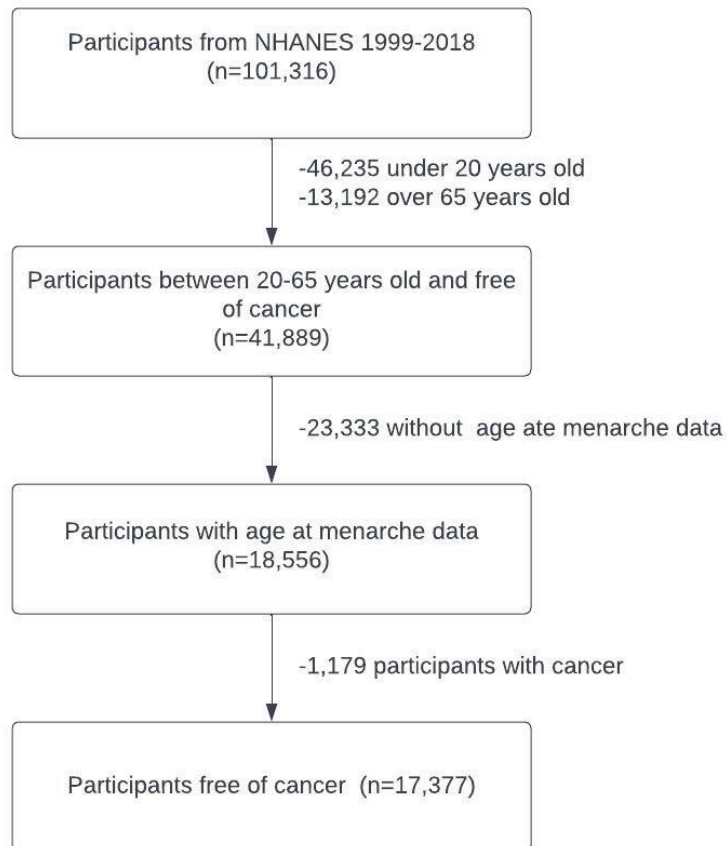

**Figure 1:** Flowchart of participant inclusion

### Stratification by Race/Ethnicity

**Table 1a:** Weighted OR and 95% CI of diabetes according to age at menarche in NHANES 1999-2018 (cancer patients excluded) under 65 years old in White participants

|                        | Cases /Total n | ≤10             | 11              | 12              | 13       | 14              | ≥15             | P trend (linear) | P trend (nonlinear) |
|------------------------|----------------|-----------------|-----------------|-----------------|----------|-----------------|-----------------|------------------|---------------------|
| <b>Type 2 Diabetes</b> |                |                 |                 |                 |          |                 |                 |                  |                     |
| Cases/total n          |                | 55/495          | 64/891          | 135/1822        | 105/1822 | 44/922          | 49/818          |                  |                     |
| Model 1                | 452/6770       | 2.05(1.43-2.94) | 1.30(0.88-1.89) | 1.47(1.06-1.89) | 1        | 0.87(0.58-1.32) | 0.98(0.61-1.58) | 0.00016          | 0.003               |
| Model 2                | 452/6770       | 1.92(1.33-2.76) | 1.32(0.89-1.94) | 1.46(1.05-2.04) | 1        | 0.95(0.62-1.45) | 0.99(0.61-1.62) | 0.0053           | <.0096              |
| Model 3                | 452/6770       | 1.81(1.25-2.65) | 1.35(0.92-1.99) | 1.43(1.03-1.99) | 1        | 0.92(0.61-1.41) | 0.97(0.60-1.58) | 0.005            | <.0086              |
| Model 4                | 452/6770       | 1.41(0.96-2.06) | 1.06(0.71-1.56) | 1.33(0.96-1.84) | 1        | 0.96(0.63-1.47) | 1.18(0.74-1.87) | 0.37             | 0.42                |

**Table 1b:** Weighted OR and 95% CI of diabetes according to age at menarche in NHANES 1999-2018 (cancer patients excluded) under 65 years old in Hispanic participants

|                        | Cases /Total n | ≤10             | 11              | 12              | 13       | 14              | ≥15             | P trend (linear) | P trend (nonlinear) |
|------------------------|----------------|-----------------|-----------------|-----------------|----------|-----------------|-----------------|------------------|---------------------|
| <b>Type 2 Diabetes</b> |                |                 |                 |                 |          |                 |                 |                  |                     |
| Cases/total n          |                | 68/476          | 96/745          | 150/1311        | 112/1077 | 86/710          | 84/693          |                  |                     |
| Model 1                | 596/5012       | 1.42(0.95-2.13) | 1.16(0.72-1.87) | 1.03(0.74-1.42) | 1        | 1.04(0.71-1.52) | 0.91(0.62-1.33) | 0.06             | 0.07                |
| Model 2                | 596/5012       | 1.27(0.85-1.90) | 1.10(0.68-1.79) | 1.00(0.71-1.41) | 1        | 0.94(0.64-1.45) | 0.92(0.62-1.35) | 0.15             | 0.18                |
| Model 3                | 596/5012       | 1.29(0.87-1.92) | 1.12(0.68-1.83) | 1.02(0.72-1.44) | 1        | 0.93(0.63-1.38) | 0.90(0.62-1.32) | 0.09             | 0.11                |
| Model 4                | 596/5012       | 1.00(0.65-1.52) | 1.01(0.60-1.70) | 0.91(0.64-1.30) | 1        | 0.93(0.63-1.39) | 0.93(0.63-1.39) | 0.84             | 0.87                |

**Table 1c:** Weighted OR and 95% CI of diabetes according to age at menarche in NHANES 1999-2018 (cancer patients excluded) under 65 years old in Black participants

|                                 | Cases/<br>Total<br>n | ≤10                 | 11                  | 12                  | 13      | 14                  | ≥15                     | P<br>trend<br>(linear<br>) | P trend<br>(nonlin<br>ear) |
|---------------------------------|----------------------|---------------------|---------------------|---------------------|---------|---------------------|-------------------------|----------------------------|----------------------------|
| <b>Type 2<br/>Diabete<br/>s</b> |                      |                     |                     |                     |         |                     |                         |                            |                            |
| Cases/<br>total n               |                      | 76/476              | 85/516              | 152/1018            | 111/855 | 56/452              | 79/600                  |                            |                            |
| Model<br>1                      | 559/3<br>917         | 1.50(1.07-<br>2.11) | 1.63(1.10<br>-2.43) | 1.24(0.89<br>-1.74) | 1       | 0.84(0.56<br>-1.24) | 0.94(0.70<br>-1.28)     | 0.003                      | 0.004                      |
| Model<br>2                      | 559/3<br>917         | 1.48(1.06-<br>2.07) | 1.57(1.04<br>-2.36) | 1.27(0.90<br>-1.79) | 1       | 0.83(0.56<br>-1.24) | 0.99(0.71<br>-1.36)     | 0.009                      | 0.01                       |
| Model<br>3                      | 559/3<br>917         | 1.53(1.10-<br>2.12) | 1.59(1.06<br>-2.38) | 1.27(0.90<br>-1.80) | 1       | 0.85(0.57<br>-1.27) | 0.99<br>(0.72-<br>1.38) | 0.007                      | 0.01                       |
| Model<br>4                      | 559/3<br>917         | 1.39(0.99-<br>1.95) | 1.46(0.98<br>-2.18) | 1.23(0.86<br>-1.75) | 1       | 0.87(0.58<br>-1.31) | 1.04(0.74<br>-1.47)     | 0.04                       | 0.07                       |

**Table 2a:** Weighted OR and 95% CI of cardiovascular disease according to age at menarche in NHANES 1999-2018 among Diabetes Patients under 65 years old in White participants

|                   | Case/<br>Total<br>n | ≤10                 | 11                  | 12                  | 13     | 14                  | 15                  | P<br>trend<br>(linear) | P trend<br>(nonlin<br>ear) |
|-------------------|---------------------|---------------------|---------------------|---------------------|--------|---------------------|---------------------|------------------------|----------------------------|
| Total<br>CVD      |                     |                     |                     |                     |        |                     |                     |                        |                            |
| Cases/<br>total n |                     | 11/55               | 11/64               | 14/135              | 11/105 | 5/44                | 5/49                |                        |                            |
| Model 1           | 57/<br>452          | 1.86(0.85<br>-4.07) | 1.07(0.46<br>-2.51) | 0.57(0.23<br>-1.46) | 1      | 0.92(0.3<br>2-2.58) | 0.69(0.23<br>-2.07) | 0.11                   | 0.33                       |
| Model 2           | 57/<br>452          | 1.70(0.81<br>-3.54) | 0.88(0.40<br>-1.98) | 0.49(0.18<br>-1.32) | 1      | 0.84(0.3<br>1-2.30) | 0.67(0.23<br>-1.95) | 0.10                   | 0.48                       |
| Model 3           | 57/<br>452          | 1.70(0.84<br>-3.43) | 0.92(0.45<br>-1.90) | 0.81(0.31<br>-1.34) | 1      | 0.81(0.3<br>1-2.09) | 0.70(0.24<br>-1.99) | 0.18                   | 0.38                       |
| Model 4           | 57/<br>452          | 1.65(0.82<br>-3.31) | 0.80(0.38<br>-1.71) | 0.51(0.21<br>-1.27) | 1      | 0.79(0.3<br>0-2.13) | 0.62(0.27<br>-1.42) | 0.16                   | 0.30                       |
| CHD               |                     |                     |                     |                     |        |                     |                     |                        |                            |
| Cases/tot<br>al n |                     | 2/55                | 5/64                | 10/134              | 5/105  | 4/44                | 4/49                |                        |                            |
| Model 1           | 30/<br>451          | 0.97(0.31<br>-2.98) | 1.31(0.38<br>-4.47) | 1.07(0.40<br>-2.89) | 1      | 1.86(0.5<br>9-5.95) | 0.20(0.20<br>-3.45) | 0.67                   | 0.66                       |
| Model 2           | 30/<br>451          | 0.81(0.27<br>-2.42) | 0.81(0.30<br>-2.21) | 0.85(0.31<br>-2.34) | 1      | 1.71(0.4<br>9-5.93) | 1.13(0.27<br>-4.77) | 0.29                   | 0.28                       |
| Model 3           | 30/<br>451          | 0.68(0.17<br>-2.72) | 0.83(0.31<br>-2.22) | 0.95(0.31<br>-2.90) | 1      | 1.82(0.5<br>8-5.70) | 1.20(0.31<br>-4.59) | 0.19                   | 0.19                       |
| Model 4           | 30/<br>451          | 0.61(0.14<br>-2.22) | 0.68(0.24<br>-2.22) | 0.91(0.29<br>-2.90) | 1      | 1.76(0.5<br>8-5.70) | 1.15(0.37<br>-4.59) | 0.15                   | 0.15                       |

|               |        |                 |                 |                 |       |                  |                 |        |      |
|---------------|--------|-----------------|-----------------|-----------------|-------|------------------|-----------------|--------|------|
|               | 451    | -2.70)          | -1.93)          | -2.82)          |       | 2-5.99)          | -3.55)          |        |      |
| Stroke        |        |                 |                 |                 |       |                  |                 |        |      |
| Cases/total n |        | 7/54            | 7/64            | 5/135           | 6/105 | 1/44             | 1/49            |        |      |
| Model 1       | 27/451 | 2.10(0.71-6.23) | 1.30(0.48-3.53) | 0.45(0.14-1.41) | 1     | 0.36(0.04-3.60)  | 0.43(0.18-0.99) | 0.02   | 0.03 |
| Model 2       | 27/451 | 2.15(0.67-6.84) | 1.31(0.45-3.80) | 0.43(0.12-1.57) | 1     | 0.36(0.03-4.30)  | 0.41(0.18-0.96) | <0.001 | 0.03 |
| Model 3       | 27/451 | 2.49(0.80-7.76) | 1.62(0.66-3.93) | 0.46(0.14-1.50) | 1     | 0.377(0.03-4.22) | 0.50(0.19-1.28) | 0.01   | 0.01 |
| Model 4       | 27/451 | 2.74(0.91-8.29) | 1.46(0.57-3.75) | 0.48(0.16-1.45) | 1     | 0.34(0.024-4.85) | 0.49(0.20-1.23) | 0.008  | 0.02 |

**Table 2b:** Weighted OR and 95% CI of cardiovascular disease according to age at menarche in NHANES 1999-2018 among Diabetes Patients under 65 years old BLACK

|               | Case/Total n | ≤10                  | 11                   | 12                   | 13     | 14                   | 15                   | P trend (linear) | P trend (nonlinear) |
|---------------|--------------|----------------------|----------------------|----------------------|--------|----------------------|----------------------|------------------|---------------------|
| Total CVD     |              |                      |                      |                      |        |                      |                      |                  |                     |
| Cases/total n |              | 15/76                | 10/85                | 19/152               | 16/111 | 8/56                 | 8/79                 |                  |                     |
| Model 1       | 76/559       | 1.263 (0.588, 2.710) | 0.877 (0.422, 1.823) | 0.580 (0.300, 1.121) | 1      | 1.115 (0.514, 2.419) | 0.431 (0.205, 0.906) | 0.04             | 0.03                |
| Model 2       | 76/559       | 1.433 (0.649, 3.165) | 0.944 (0.444, 2.006) | 0.621 (0.317, 1.218) | 1      | 1.186 (0.526, 2.676) | 0.479 (0.213, 1.076) | 0.03             | 0.03                |
| Model 3       | 76/559       | 1.557 (0.766, 3.163) | 0.752 (0.346, 1.632) | 0.654 (0.328, 1.302) | 1      | 1.136 (0.492, 2.621) | 0.505 (0.237, 1.077) | 0.06             | 0.06                |
| Model 4       | 76/559       | 1.490 (0.729, 3.048) | 0.725 (0.332, 1.586) | 0.614 (0.300, 1.259) | 1      | 1.102 (0.482, 2.523) | 0.457 (0.213, 0.984) | 0.03             | 0.04                |
| CHD           |              |                      |                      |                      |        |                      |                      |                  |                     |
| Cases/total n |              | 1/75                 | 3/85                 | 5/151                | 10/111 | 1/56                 | 0/79                 |                  |                     |
| Model 1       | 20/557       | 0.131 (0.082, 0.210) | 0.724 (0.401, 1.308) | 0.173 (0.066, 0.458) | 1      | 0.162 (0.020, 1.340) | -                    | <0.001           | 0.009               |
| Model 2       | 20/557       | 0.157 (0.094, 0.263) | 1.002 (0.518, 1.938) | 0.226 (0.082, 0.617) | 1      | 0.248 (0.029, 2.108) | -                    | <0.0001          | 0.008               |

|               |        |                         |                         |                         |       |                         |                 |         |        |
|---------------|--------|-------------------------|-------------------------|-------------------------|-------|-------------------------|-----------------|---------|--------|
| Model 3       | 20/557 | 0.152<br>(0.065, 0.359) | 0.670<br>(0.328, 1.369) | 0.258<br>(0.080, 0.838) | 1     | 0.314<br>(0.036, 2.711) | -               | <0.0001 | 0.07   |
| Model 4       | 20/557 | 0.225<br>(0.091, 0.558) | 0.843<br>(0.339, 2.094) | 0.434<br>(0.155, 1.218) | 1     | 0.211<br>(0.028, 1.615) | -               | <0.0001 | 0.0016 |
| Stroke        |        |                         |                         |                         |       |                         |                 |         |        |
| Cases/total n |        | 10/76                   | 6/85                    | 11/152                  | 5/111 | 5/56                    | 6/79            |         |        |
| Model 1       | 43/559 | 4.06(2.11-7.80)         | 2.40(1.09-5.27)         | 1.92(1.01-3.65)         | 1     | 4.33(2.1-8.88)          | 1.69(0.94-3.04) | 0.009   | 0.16   |
| Model 2       | 43/559 | 4.32(2.26-8.25)         | 2.63(1.15-6.02)         | 1.99(1.01-3.91)         | 1     | 4.16(1.9-9.8.69)        | 1.93(1.06-3.53) | 0.0004  | 0.16   |
| Model 3       | 43/559 | 4.87(2.67-8.90)         | 2.10(0.85-5.24)         | 2.16(1.04-4.52)         | 1     | 4.1(1.80-9.33)          | 2.10(1.17-3.73) | 0.0002  | 0.18   |
| Model 4       | 43/559 | 4.29(2.20-8.39)         | 2.05(0.84-5.00)         | 1.72(0.79-3.78)         | 1     | 3.99(1.76-9.06)         | 1.74(0.95-3.20) | 0.002   | 0.26   |

**Table 2c:** Weighted OR and 95% CI of cardiovascular disease according to age at menarche in NHANES 1999-2018 among Diabetes Patients under 65 years old in Hispanic participants

|               | Case/Total n | ≤10                      | 11                       | 12                       | 13    | 14                       | 15                       | P trend (linear) | P trend (nonlinear) |
|---------------|--------------|--------------------------|--------------------------|--------------------------|-------|--------------------------|--------------------------|------------------|---------------------|
| Total CVD     |              |                          |                          |                          |       |                          |                          |                  |                     |
| Cases/total n |              | 6/68                     | 12/96                    | 17/150                   | 4/112 | 8/86                     | 8/84                     |                  |                     |
| Model 1       | 55/596       | 4.406<br>(1.160, 16.738) | 3.745<br>(1.143, 12.266) | 4.573<br>(1.651, 12.669) | 1     | 3.734<br>(0.980, 14.228) | 3.976<br>(1.128, 14.020) | 0.78             | 0.84                |
| Model 2       | 55/596       | 3.490<br>(0.819, 14.869) | 3.192<br>(0.957, 10.650) | 3.812<br>(1.356, 10.719) | 1     | 3.372<br>(0.852, 13.348) | 3.649<br>(1.080, 12.326) | 0.95             | 0.89                |
| Model 3       | 55/596       | 3.184<br>(0.705, 14.382) | 3.361<br>(0.986, 11.453) | 4.487<br>(1.482, 13.582) | 1     | 3.268<br>(0.889, 12.003) | 3.101<br>(0.924, 10.407) | 0.86             | 0.91                |
| Model 4       | 55/596       | 3.201<br>0.766<br>13.367 | 2.982<br>(0.818, 10.876) | 3.695<br>(1.177, 11.602) | 1     | 3.427<br>(1.005, 11.683) | 2.461<br>(0.740, 8.190)  | 0.77             | 0.82                |
| CHD           |              |                          |                          |                          |       |                          |                          |                  |                     |
|               |              | 3/68                     | 4/95                     | 5/150                    | 1/111 | 3/86                     | 2/84                     |                  |                     |

|               |        |                         |                          |                          |       |                          |                          |       |      |
|---------------|--------|-------------------------|--------------------------|--------------------------|-------|--------------------------|--------------------------|-------|------|
| Cases/total n |        |                         |                          |                          |       |                          |                          |       |      |
| Model 1       | 18/594 | 2.202<br>(0.654, 7.409) | 3.991<br>(1.437, 11.086) | 3.276<br>(1.764, 6.086)  | 1     | 7.658<br>(0.988, 59.360) | 1.603<br>(0.328, 7.828)  | 0.87  | 0.88 |
| Model 2       | 18/594 | 2.102<br>(0.642, 6.889) | 5.715<br>(1.391, 23.487) | 3.912<br>(1.459, 10.486) | 1     | 7.811<br>(1.647, 37.051) | 1.769<br>(0.275, 11.377) | 0.96  | 0.68 |
| Model 3       | 18/594 | 1.638<br>(0.450, 5.960) | 4.434<br>(1.083, 18.150) | 4.515<br>(1.781, 11.444) | 1     | 5.175<br>(1.986, 13.488) | 1.503<br>(0.290, 7.800)  | 0.97  | 0.95 |
| Model 4       | 18/594 | 1.592<br>(0.427, 5.928) | 3.485<br>(0.948, 12.812) | 4.330<br>(1.715, 10.935) | 1     | 4.882<br>(2.162, 11.025) | 1.069<br>(0.150, 7.594)  | 0.87  | 0.85 |
|               |        |                         |                          |                          |       |                          |                          |       |      |
| Stroke        |        |                         |                          |                          |       |                          |                          |       |      |
| Cases/total n |        | 3/68                    | 5/95                     | 11/150                   | 2/112 | 4/86                     | 5/84                     |       |      |
| Model 1       | 30/595 | 1.098<br>(0.293, 4.107) | 2.234<br>(0.609, 8.197)  | 6.550<br>(1.928, 22.249) | 1     | 2.304<br>(0.487, 10.890) | 4.296<br>(0.807, 22.865) | 0.007 | 0.16 |
| Model 2       | 30/595 | 0.886<br>(0.236, 3.323) | 1.787<br>(0.488, 6.542)  | 5.123<br>(1.484, 17.683) | 1     | 1.967<br>(0.393, 9.836)  | 4.052<br>(0.784, 20.941) | 0.01  | 0.35 |
| Model 3       | 30/595 | 0.732<br>(0.191, 2.815) | 1.883<br>(0.485, 7.317)  | 5.259<br>(1.490, 18.562) | 1     | 1.882<br>(0.371, 9.555)  | 4.000<br>(0.736, 21.726) | 0.006 | 0.30 |
| Model 4       | 30/595 | 0.796<br>(0.172, 3.678) | 1.551<br>(0.366, 6.569)  | 4.493<br>(1.244, 16.225) | 1     | 2.026<br>(0.351, 11.697) | 2.786<br>(0.531, 14.608) | 0.08  | 0.35 |

### SENSITIVITY ANALYSIS BY MENOPAUSE STATUS

**Table 1d:** Weighted OR and 95% CI of diabetes according to age at menarche in NHANES 1999-2018 (cancer patients excluded) under 65 years old in pre-menopausal

|                        | Cases/Total n | ≤10             | 11              | 12              | 13       | 14              | ≥15             | P trend (linear) | P trend (nonlinear) |
|------------------------|---------------|-----------------|-----------------|-----------------|----------|-----------------|-----------------|------------------|---------------------|
| <b>Type 2 Diabetes</b> |               |                 |                 |                 |          |                 |                 |                  |                     |
| Cases/total n          |               | 74/930          | 77/1356         | 158/2732        | 104/2404 | 54/1340         | 56/1327         |                  |                     |
| Model 1                | 523/10089     | 2.16(1.50-3.12) | 1.49(1.00-2.22) | 1.32(0.94-1.85) | 1        | 0.98(0.62-1.54) | 0.76(0.48-1.21) | <0.001           | <0.001              |

|         |           |                 |                 |                 |   |                 |                 |        |         |
|---------|-----------|-----------------|-----------------|-----------------|---|-----------------|-----------------|--------|---------|
| Model 2 | 523/10089 | 1.75(1.21-2.54) | 1.45(0.96-2.19) | 1.30(0.93-1.83) | 1 | 1.00(0.64-1.56) | 0.75(0.47-1.21) | 0.0003 | 0.006   |
| Model 3 | 523/10089 | 1.77(1.22-2.55) | 1.46(0.96-2.21) | 1.33(0.94-1.86) | 1 | 1.01(0.65-1.59) | 0.75(0.47-1.21) | 0.0003 | <0.0005 |
| Model 4 | 523/10089 | 1.36(0.93-2.00) | 1.21(0.79-1.85) | 1.06(0.86-1.74) | 1 | 0.83(0.66-1.70) | 0.83(0.51-1.37) | 0.04   | 0.05    |

**Table 1e:** Weighted OR and 95% CI of diabetes according to age at menarche in NHANES 1999-2018 (cancer patients excluded) under 65 years old in pos-menopausal

|                        | Cases /Total n | ≤10             | 11              | 12              | 13       | 14              | ≥15             | P trend (linear) | P trend (nonlinear) |
|------------------------|----------------|-----------------|-----------------|-----------------|----------|-----------------|-----------------|------------------|---------------------|
| <b>Type 2 Diabetes</b> |                |                 |                 |                 |          |                 |                 |                  |                     |
| Cases/total n          |                | 143/635         | 182/957         | 330/1834        | 256/1767 | 152/991         | 187/1102        |                  |                     |
| Model 1                | 1250/7286      | 1.72(1.22-2.42) | 1.27(0.92-1.75) | 1.41(1.06-1.87) | 1        | 0.93(0.66-1.33) | 1.14(0.84-1.57) | 0.006            | 0.01                |
| Model 2                | 1250/7286      | 1.58(1.10-2.26) | 1.22(0.87-1.71) | 1.40(1.05-1.88) | 1        | 0.92(0.65-1.31) | 1.03(0.74-1.43) | 0.005            | 0.007               |
| Model 3                | 1250/7286      | 1.56(1.09-2.23) | 1.27(0.90-1.79) | 1.41(1.05-1.90) | 1        | 0.93(0.65-1.33) | 1.02(0.73-1.42) | 0.004            | 0.006               |
| Model 4                | 1250/7286      | 1.30(0.90-1.86) | 1.10(0.78-1.56) | 1.33(0.99-1.78) | 1        | 0.95(0.67-1.37) | 1.17(0.85-1.60) | 0.31             | 0.35                |
